# Supplementary material for: An in situ formed ZIF-67 derived NiFeCo-P nano-array for accelerating the electrocatalytic oxygen evolution reaction
Source: Royal Society of Chemistry journal article supplement (doi:10.1039/d3ya00581j), 2024-01-01
Supplement: d3ya00581j1.pdf [file d3ya00581j1.pdf]

## Supporting Information

### **In situ formed ZIF-67 derived NiFeCo-P nano-array for accelerating electrocatalytic oxygen evolution reaction**

Xi Guo, Li Li,\* Shuo Wang, Huan Zhang, Yuzhen Kuang, Guangbin Duan,\* and

Bingqiang Cao

School of Materials Science and Engineering, University of Jinan, Jinan 250022,

China

\*Corresponding-Author: Li Li

E-mail: mse\_lil@ujn.edu.cn (L. Li)

Tel: +86-15621888686

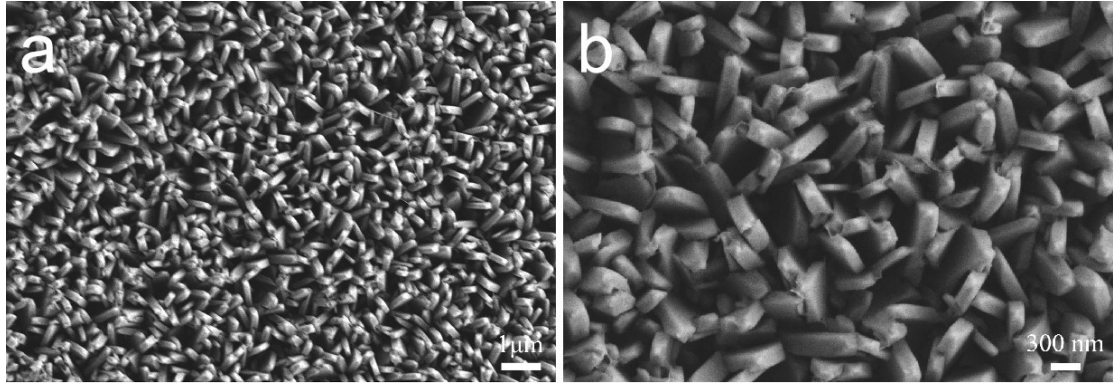

**Fig. S1.** SEM images of ZIF-67/NF.

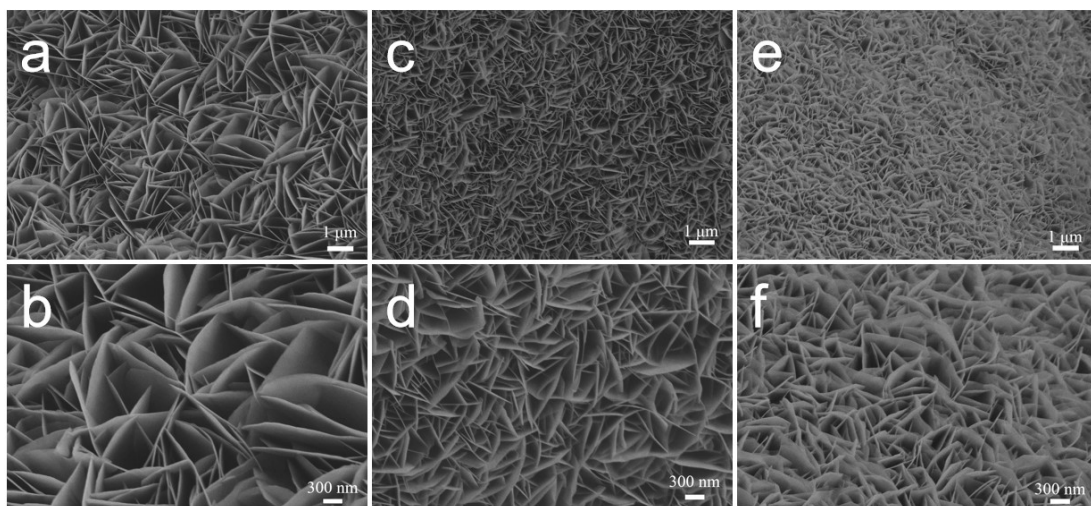

**Fig. S2.** SEM images of (a, b)  $\text{Ni}_{0.8}\text{Fe}_{0.2}$ -LDH, (c, d)  $\text{NiFe}$ -LDH and (e, f)  $\text{Ni}_{0.86}\text{Fe}_{0.14}$ -LDH.

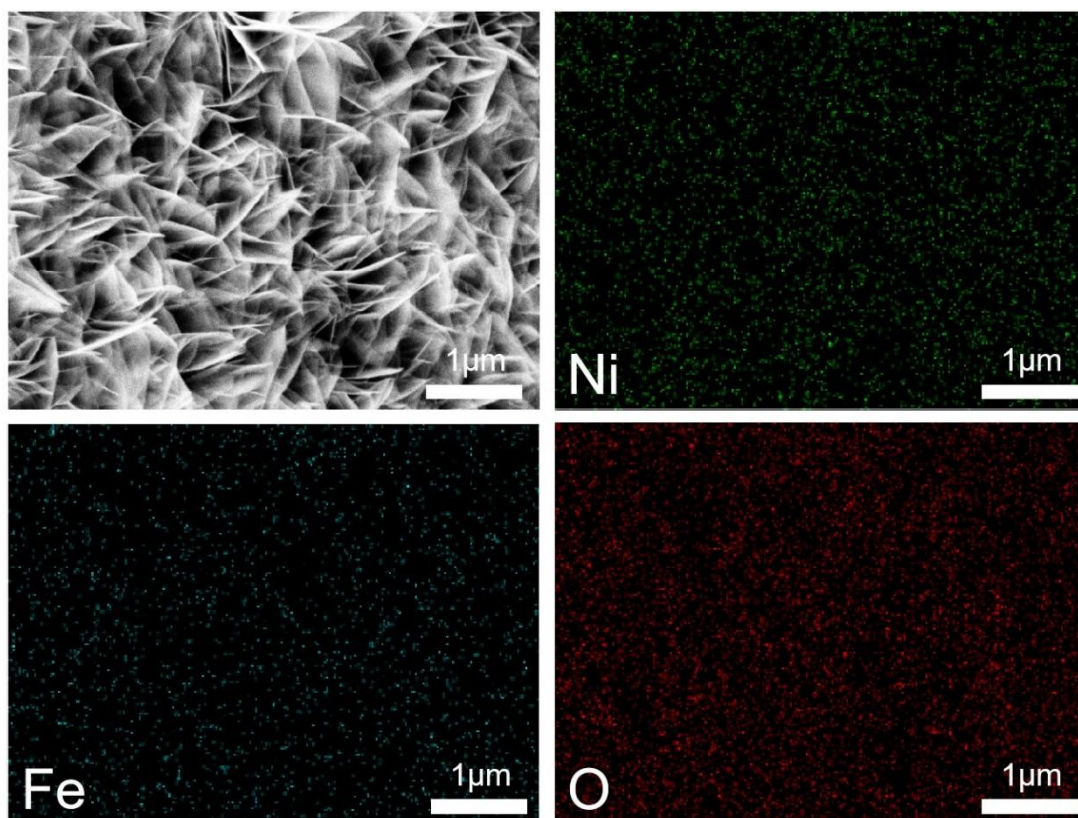

**Fig. S3.** SEM images and corresponding elemental mapping of NiFe-LDH.

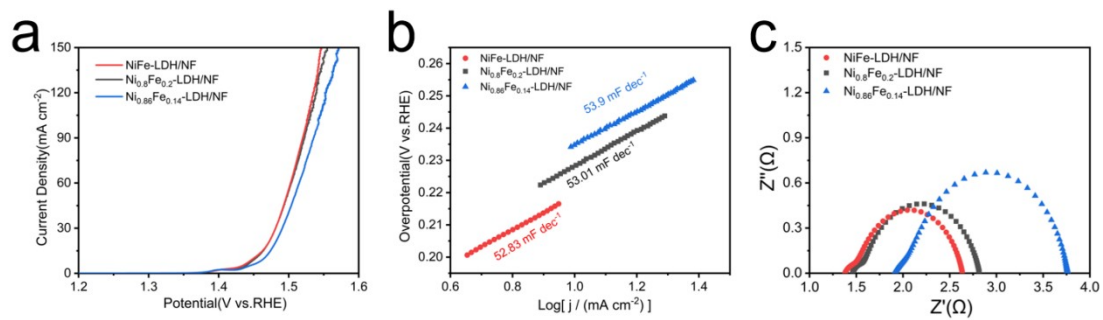

**Fig. S4.** Electrochemical OER properties of NiFe-LDH/NF electrodes prepared with different Ni/Fe ratios were compared. (a) LSV curves, (b) Tafel plots, and (c) EIS curves.

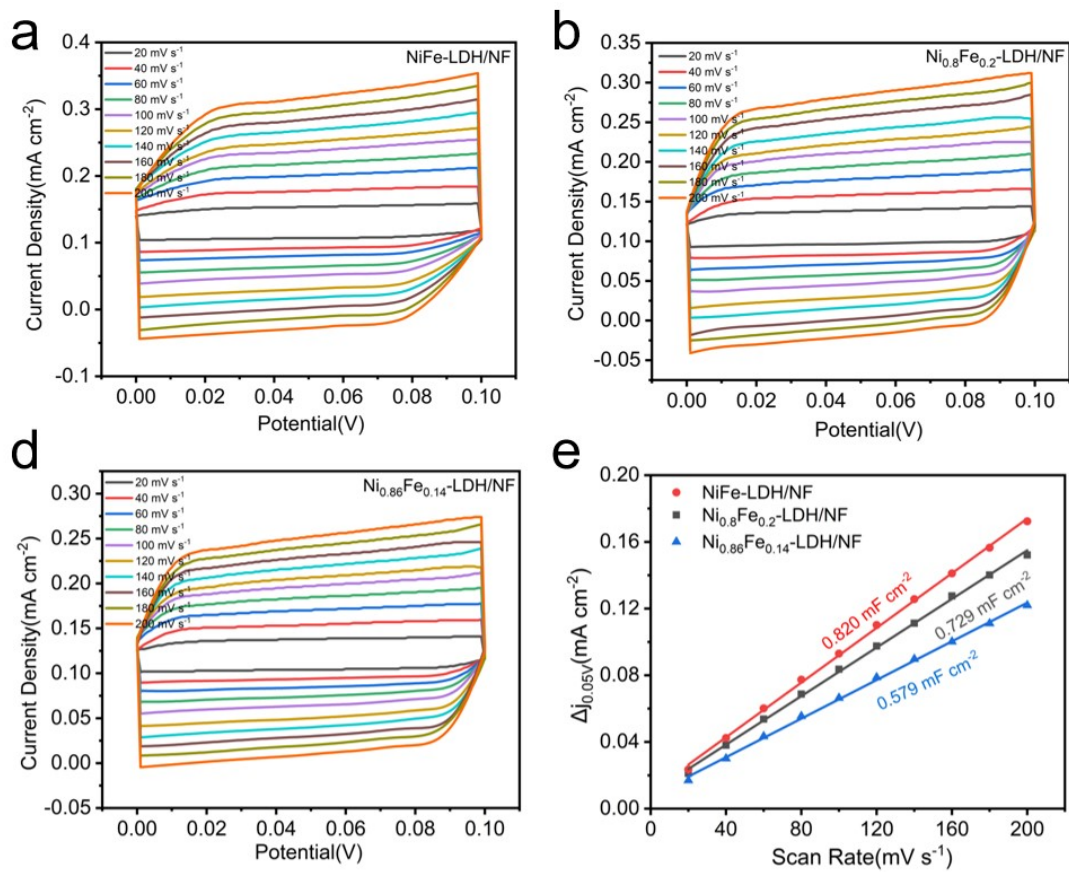

**Fig. S5.** CV curves of (a) NiFe-LDH/NF, (b)  $\text{Ni}_{0.8}\text{Fe}_{0.2}$ -LDH/NF and (c)  $\text{Ni}_{0.86}\text{Fe}_{0.14}$ -LDH/NF at different scan rates, (d) the corresponding  $C_{dl}$  results.

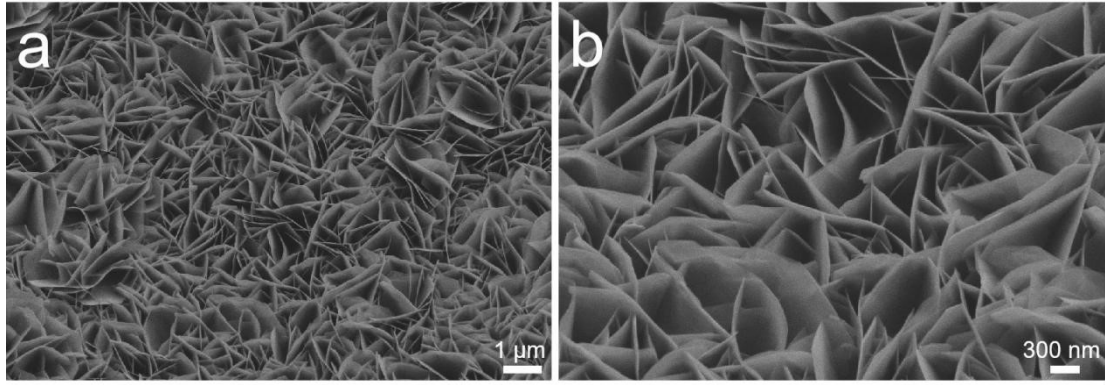

**Fig. S6.** SEM images of NiFeCo-LDH/NF.

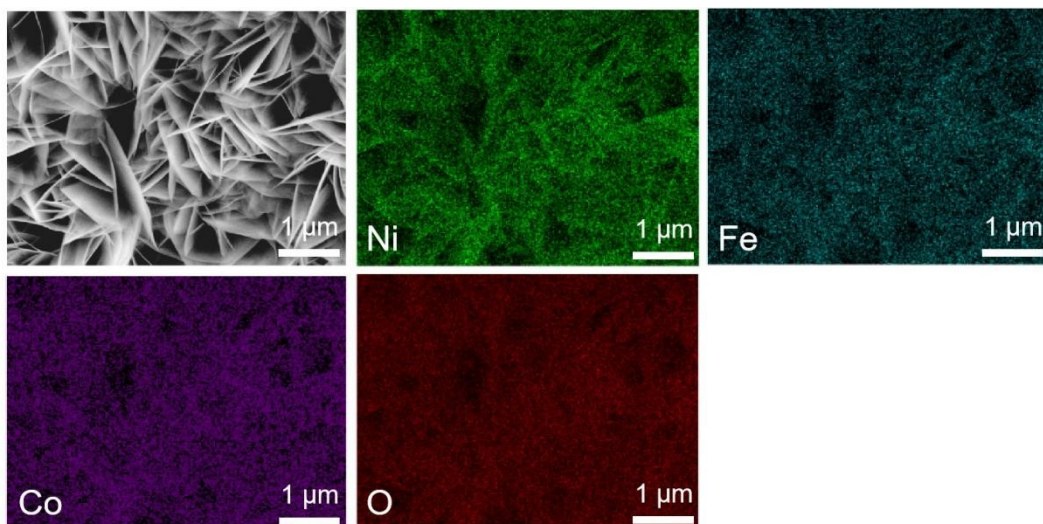

**Fig. S7.** SEM images and corresponding elemental mapping of NiFeCo-LDH.



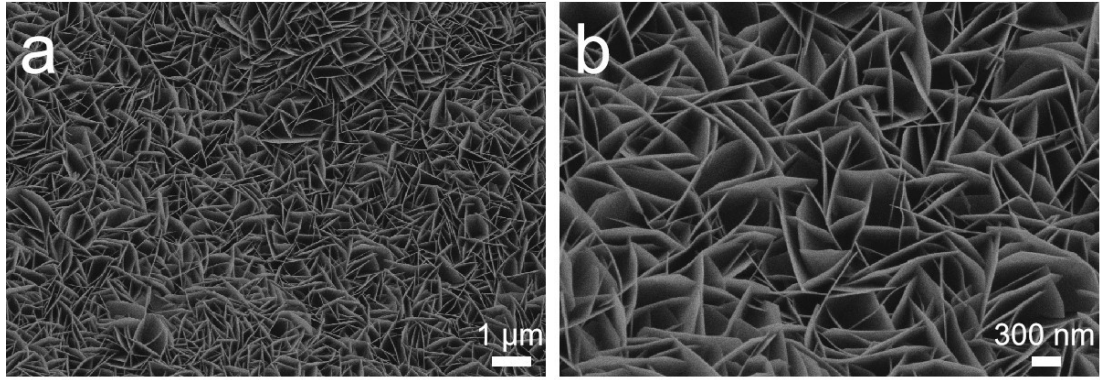

**Fig. S8.** (a,b) SEM images of NiFe-P.

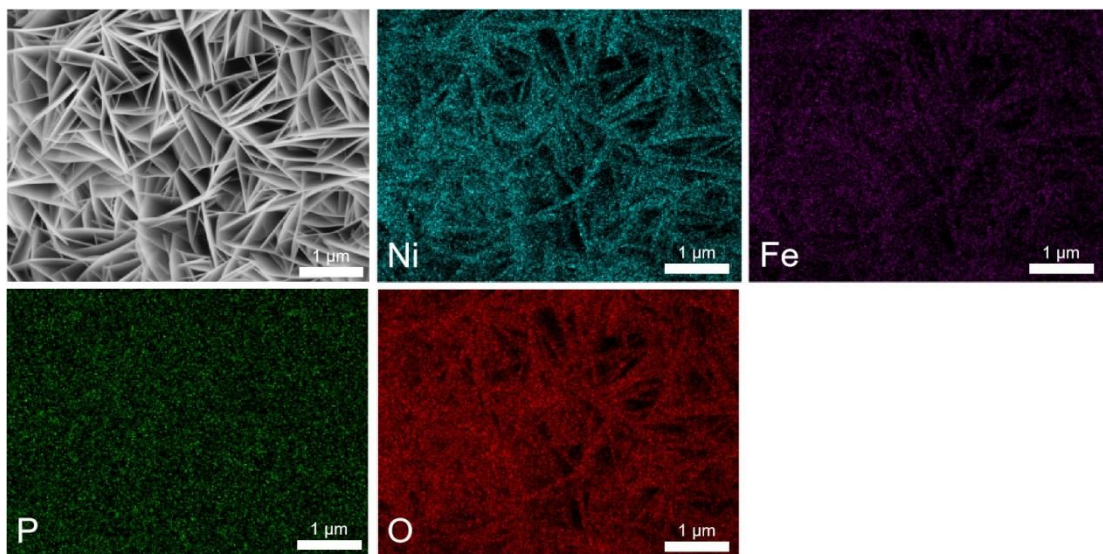

**Fig. S9.** SEM image and corresponding elemental mapping of NiFe-P/NF.

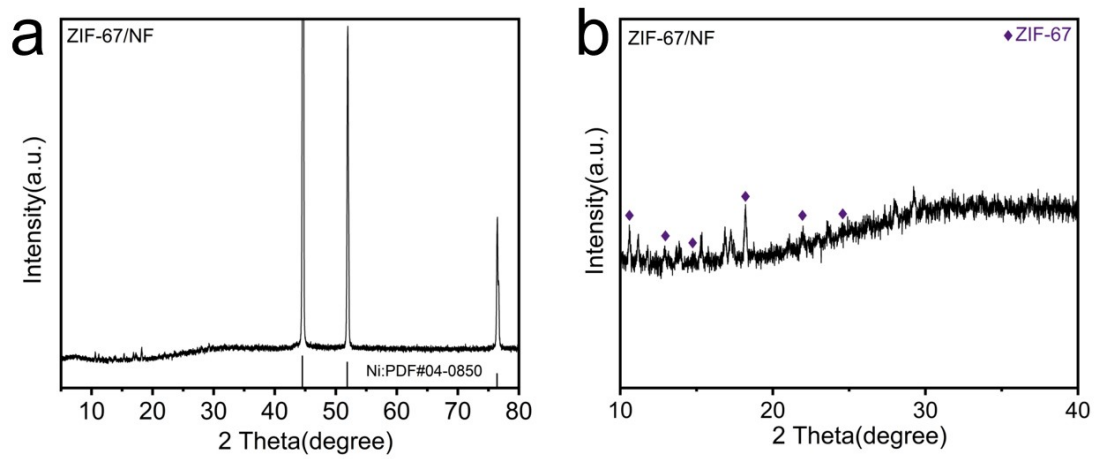

**Fig. S10.** (a,b) XRD patterns of ZIF-67/NF.

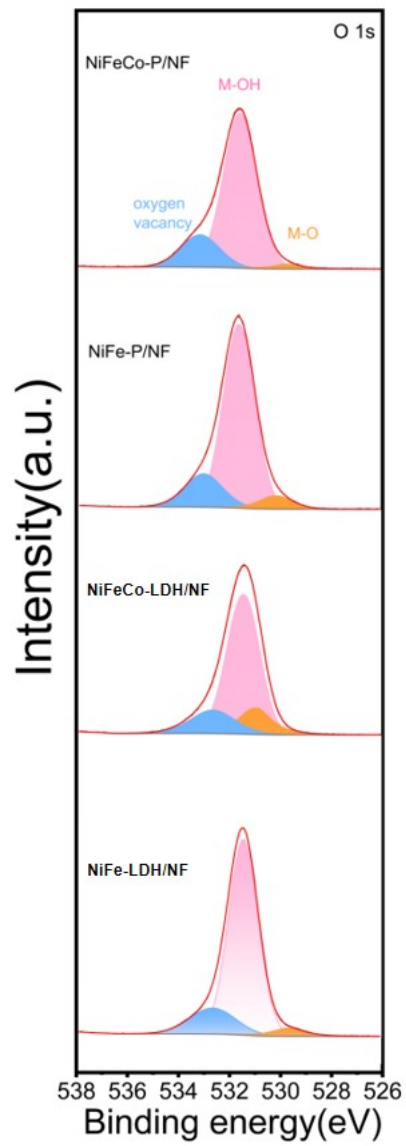

**Fig. S11.** High-resolution XPS spectra of O 1s in NiFe-LDH/NF, NiFe-P/NF, NiFeCo-LDH/NF, and NiFeCo-P/NF.

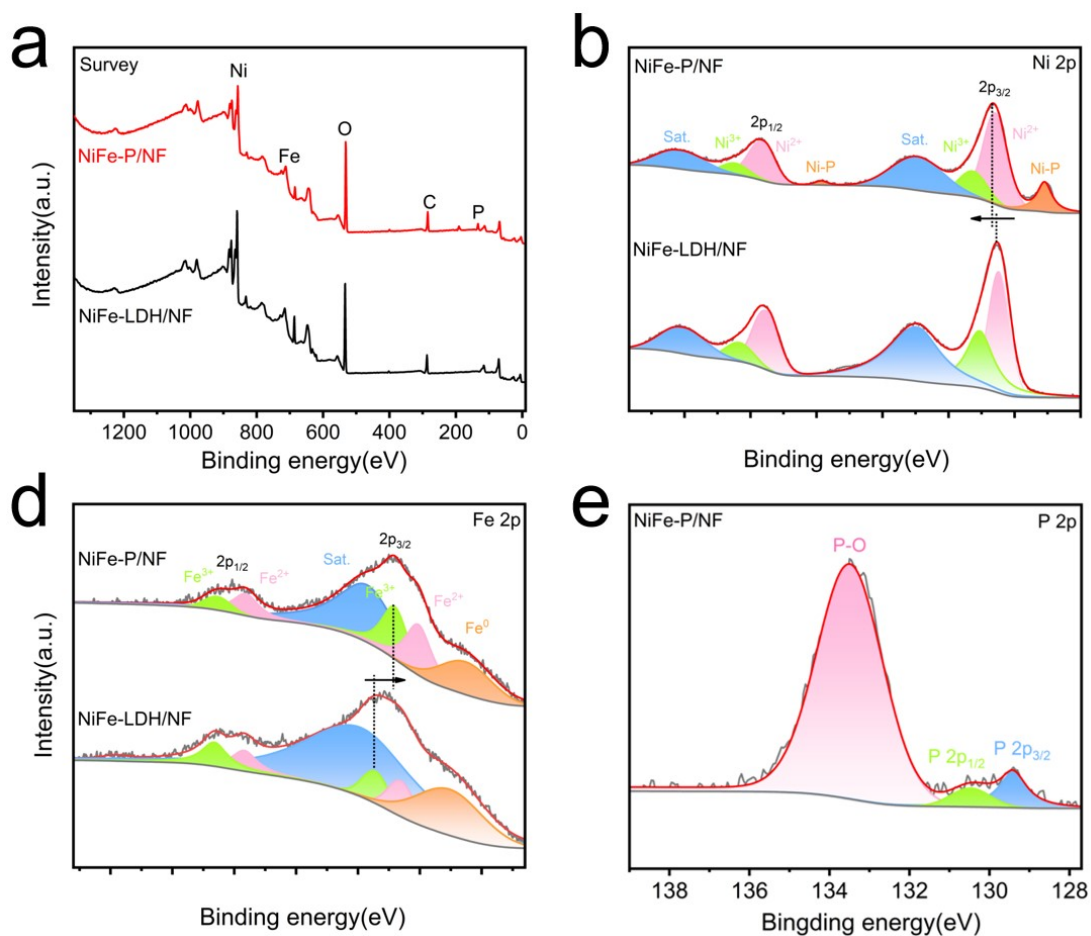

**Fig. S12.** (a) XPS spectra of NiFe-LDH/NF and NiFe-P/NF. High-resolution XPS spectra of (b) Ni 2p, and (c) Fe 2p in NiFe-LDH/NF and NiFe-P/NF and of (d) P 2p in NiFe-P/NF.

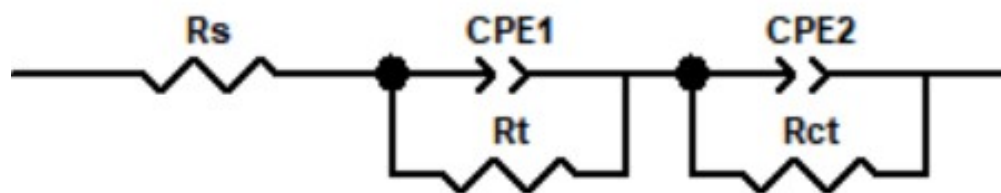

**Fig. S13.** EIS simulation of the electrocatalysts in electrocatalytic OER.

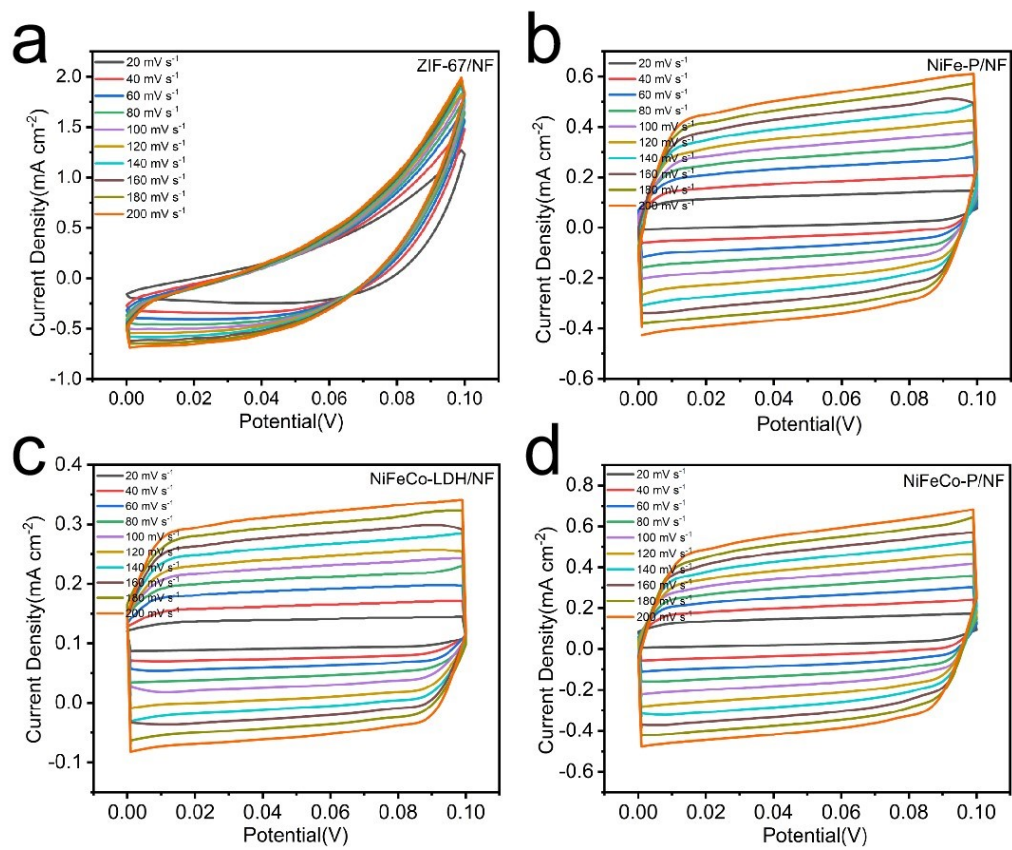

**Fig. S14.** CV curves of (a) ZIF-67/NF, (b) NiFe-P/NF, (c) NiFeCo-LDH/NF and (d) NiFeCo-P/NF at different scan rates.

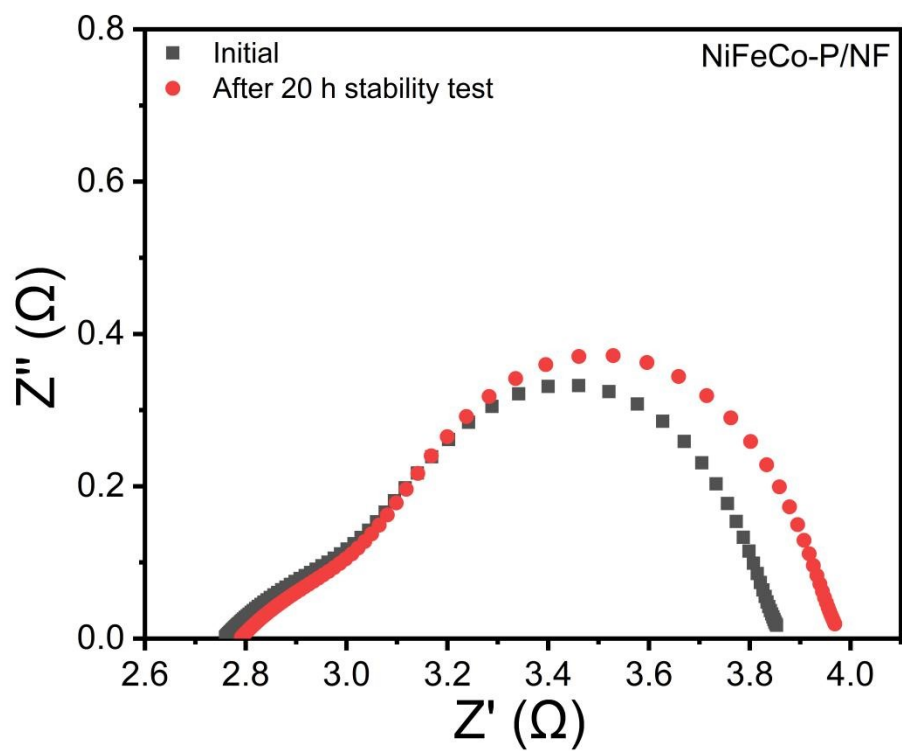

**Fig. S15.** EIS curves of NiFeCo-P/NF before and after the chronopotentiometry measurement.
